# Supplementary material for: Synthesis and characterisation of ruthenium complexes containing a pendent catechol ring
Source: Royal Society of Chemistry journal article supplement (doi:10.1039/b311989k), 2004-01-01
Supplement: b311989k-figs.s1-s2.pdf [file b311989k-figs.s1-s2.pdf]

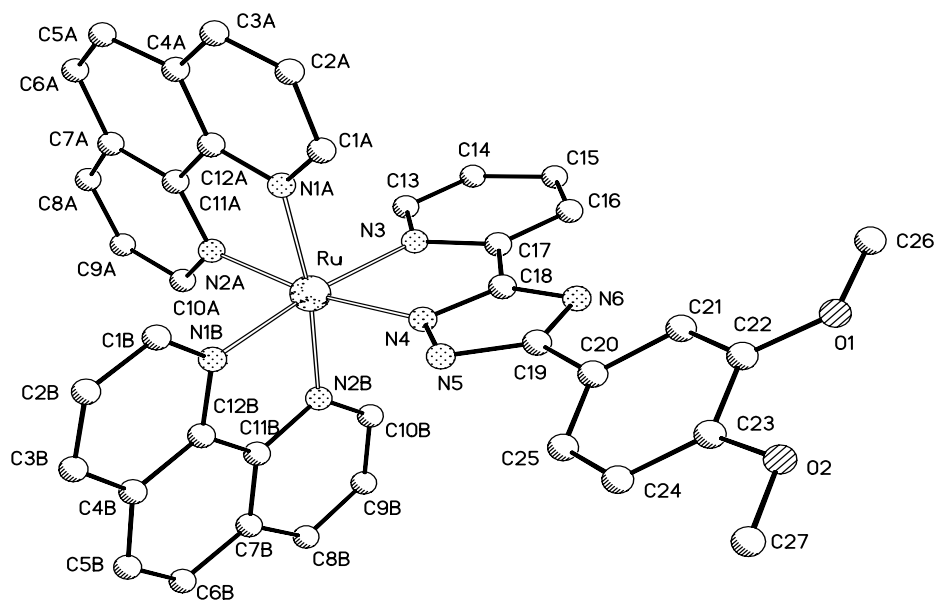

Fig. S1 Molecular structure of  $[\text{Ru}(\text{phen})_2(\text{L1})]^+$  showing atomic numbering.

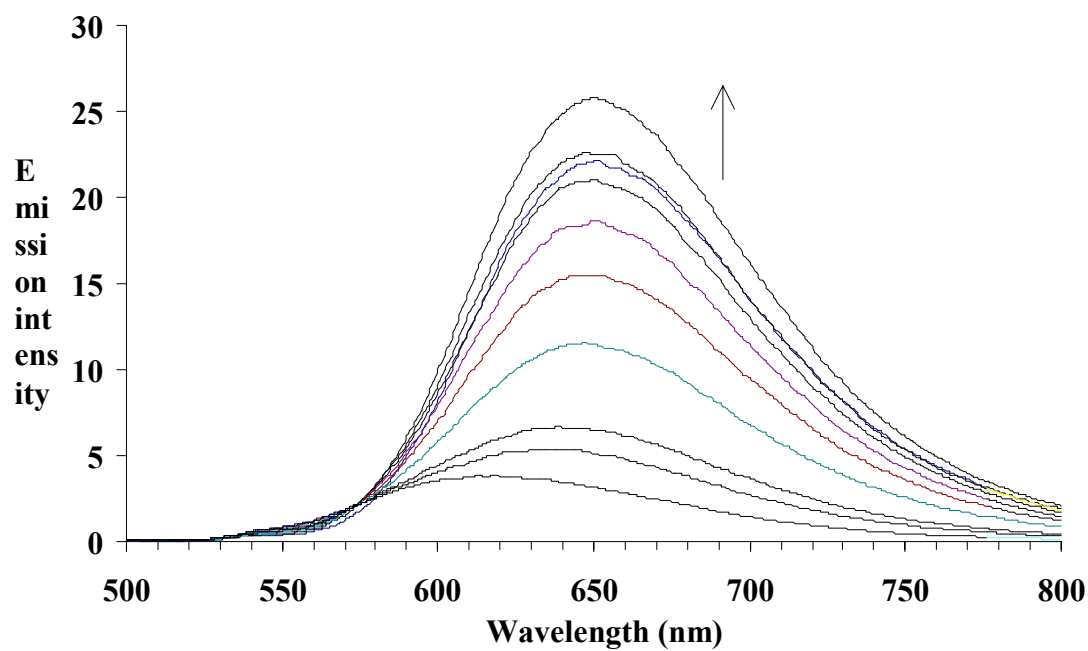

Fig. S2 pH dependence of the emission spectra of  $[\text{Ru}(\text{phen})_2(\text{L2})]^+$  ( $5 \times 10^{-5}$  M) in an aqueous Britton-Robinson buffer at pH 1.72, 2.11, 2.32, 2.84, 3.22, 3.53, 3.85, 4.11, 5.28 and 6.15.
