# Supplementary material for: Synthesis and characterisation of ruthenium complexes containing a pendent catechol ring
Source: Royal Society of Chemistry journal article supplement (doi:10.1039/b311989k), 2004-01-01
Supplement: b311989k-table.s1.pdf [file b311989k-table.s1.pdf]

**Table S1** Energy and % contribution of atomic orbitals to each molecular orbital in the frontier region for (a)  $[\text{Ru}(\text{bipy})_2(\text{L1})]^+$  and (b)  $[\text{Ru}(\text{bipy})_2(\text{HL1})]^{2+}$ . The contribution of both **HL1** and **L1**, the protonated and the deprotonated pyridyltriazole ligands, is divided into a pyridinetriazole component, *pytrz* and a contribution from the dimethoxyphenyl moiety, *ph*.

(a) Deprotonated

| MO   | eV     | Ru | bipy1 | bipy2 | pytrz | ph |
|------|--------|----|-------|-------|-------|----|
| L+4  | -2.95  | 4  | 60    | 19    | 17    | 0  |
| L+3  | -3.06  | 3  | 35    | 56    | 6     | 0  |
| L+2  | -3.30  | 5  | 8     | 22    | 65    | 0  |
| L+1  | -3.58  | 9  | 50    | 37    | 4     | 0  |
| LUMO | -3.93  | 2  | 38    | 50    | 10    | 0  |
| HOMO | -8.76  | 37 | 6     | 16    | 30    | 11 |
| H-1  | -9.15  | 57 | 20    | 10    | 13    | 0  |
| H-2  | -9.63  | 20 | 9     | 7     | 17    | 48 |
| H-3  | -10.00 | 72 | 7     | 6     | 5     | 9  |
| H-4  | -10.33 | 4  | 8     | 2     | 33    | 53 |

(b) Protonated

| MO   | eV     | Ru | bipy1 | bipy2 | pytrz | ph |
|------|--------|----|-------|-------|-------|----|
| L+4  | -5.26  | 2  | 23    | 8     | 66    | 1  |
| L+3  | -5.30  | 1  | 79    | 2     | 18    | 1  |
| L+2  | -5.97  | 8  | 9     | 74    | 9     | 0  |
| L+1  | -6.06  | 9  | 57    | 1     | 32    | 1  |
| LUMO | -6.33  | 1  | 29    | 20    | 50    | 1  |
| HOMO | -11.99 | 38 | 2     | 6     | 25    | 29 |
| H-1  | -12.22 | 69 | 15    | 13    | 3     | 0  |
| H-2  | -12.27 | 69 | 12    | 4     | 13    | 1  |
| H-3  | -12.43 | 29 | 2     | 5     | 5     | 60 |
| H-4  | -13.15 | 3  | 0     | 1     | 7     | 88 |
